# Supplementary material for: Novel NUP98::ASH1L Gene Fusion in Acute Myeloid Leukemia Detected by Optical Genome Mapping
Source: MDPI journal article supplement (doi:10.3390/cancers15112942), 2023-05-27
Supplement: s1 [file s1]

**Supplementary Table 1:** Optical Genome Mapping - Molecule Quality Parameter after Rare Variant Analysis

| OGM Molecule Quality Data            | AML diagnosis (0d)     | Prior SCT (+155d)      | Relapse (+225d)        |
|--------------------------------------|------------------------|------------------------|------------------------|
| Access Version                       | 1.7                    | 1.7                    | 1.7                    |
| Solve Version                        | Solve3.7_10192021_74_1 | Solve3.7_10192021_74_1 | Solve3.7_10192021_74_1 |
| RefAligner Version:                  | 12463                  | 12463                  | 12463                  |
| NLV                                  | 7.176                  | 11.275                 | 10.315                 |
| PLV                                  | 2.745                  | 2.61                   | 2.732                  |
| bpp                                  | 493.72                 | 491                    | 486.07                 |
| res                                  | 2.608                  | 2.589                  | 2.582                  |
| sd                                   | 0.01303                | 0.01901                | 0.01854                |
| sf                                   | 0.09035                | 0.1063                 | 0.10524                |
| sr                                   | 0.01696                | 0.01809                | 0.01693                |
| Total number of molecules            | 4351058                | 9344283                | 9220623                |
| Total length (Mbp)                   | 1291978.923            | 2369060.204            | 2343890.409            |
| Average length (kbp)                 | 296.934                | 253.53                 | 254.201                |
| Molecule N50 (kbp)                   | 313.427                | 257.705                | 257.703                |
| Label density (/100kb)               | 16.06                  | 15.337                 | 15.319                 |
| Total number of aligned molecules    | 4180719                | 8686723                | 8665191                |
| Fraction of aligned molecules        | 0.961                  | 0.93                   | 0.94                   |
| Total molecule align length (Mbp)    | 1114275.8              | 1937706.4              | 1929169.7              |
| Total reference align length (Mbp)   | 1120158.3              | 1948007.2              | 1938732.3              |
| Effective coverage of reference (X): | 361.846                | 629.267                | 626.271                |
| Average aligned length (kbp)         | 266527.3               | 223065.3               | 222634.4               |
| Fraction aligned length              | 0.904                  | 0.887                  | 0.894                  |
| Average confidence                   | 43.7                   | 33.6                   | 34.5                   |
| Deletions                            | 811                    | 857                    | 983                    |
| Insertions                           | 825                    | 839                    | 1026                   |
| Duplications                         | 126                    | 111                    | 179                    |
| Inversion breakpoints                | 524                    | 464                    | 522                    |
| Interchr. translocation breakpoints: | 32                     | 10                     | 32                     |
| Intrachr. translocation breakpoints: | 15                     | 8                      | 19                     |

**Supplementary Table 2: Optical Genome Mapping - Rare Variant Pipeline – Rare and Confident Structural Variants**

| Time Point of Analysis (Day) | ChrA | ChrB | Reference Start | Reference End | Confidence | Type     | Orientation | VAF  | Size in bases | presence in % of controls | Overlap Genes                                                                                                                                                                                                                                                                                                                                       | Putative Gene Fusion | Self molecule count | Result of OGM adapting ISCN                |
|------------------------------|------|------|-----------------|---------------|------------|----------|-------------|------|---------------|---------------------------|-----------------------------------------------------------------------------------------------------------------------------------------------------------------------------------------------------------------------------------------------------------------------------------------------------------------------------------------------------|----------------------|---------------------|--------------------------------------------|
| AML diagnosis (0d)           | 2    | 2    | 87083645        | 87097695      | 0.99       | deletion | NA          | 0.28 | 4724          | 0                         | RMND5A;CD8B;ANAPC1P1                                                                                                                                                                                                                                                                                                                                | CD8B-ANAPC1P1        | 58                  | ogm[GRCh37]2p11.2(87083645_87097695)x1     |
| AML diagnosis (0d)           | 3    | 3    | 111554983       | 111585361     | 0.99       | deletion | NA          | 0.71 | 16189         | 0                         | PLCXD2;PHLDB2                                                                                                                                                                                                                                                                                                                                       | PLCXD2-PHLDB2        | 122                 | ogm[GRCh37]3q13.2(111554983_111585361)x1   |
| AML diagnosis (0d)           | 3    | 3    | 6997453         | 9689847       | 0.99       | deletion | NA          | 0.4  | 2566875       | 0                         | GRM7;AK124857;LMCD1-AS1;U4atac;LMCD1;LINC00312;SSUH2;CAV3;OXTR;Mir_548;RAD18;SRGAP3;BC041457;SRGAP3-AS3;THUMP3;SETD5-AS1;SETD5;LHFPL4                                                                                                                                                                                                               | -                    | 78                  | ogm[GRCh37]3p26.1p25.3(6997453_9689847)x1  |
| AML diagnosis (0d)           | 3    | 3    | 6997453         | 9689847       | 0.99       | deletion | NA          | 0.4  | 2567122       | 0                         | GRM7;AK124857;LMCD1-AS1;U4atac;LMCD1;LINC00312;SSUH2;CAV3;OXTR;Mir_548;RAD18;SRGAP3;BC041457;SRGAP3-AS3;THUMP3;SETD5-AS1;SETD5;LHFPL4                                                                                                                                                                                                               | -                    | 80                  | ogm[GRCh37]3p26.1p25.3(6997453_9689847)x1  |
| AML diagnosis (0d)           | 3    | 3    | 87218114        | 87594795      | 0.99       | deletion | NA          | 0.19 | 134919        | 0                         | MIR4795;CHMP2B;POU1F1                                                                                                                                                                                                                                                                                                                               | -                    | 29                  | ogm[GRCh37]3p11.2(87218114_87594795)x1     |
| AML diagnosis (0d)           | 3    | 3    | 87449156        | 87754519      | 0.97       | deletion | NA          | 0.21 | 281369        | 0                         | -                                                                                                                                                                                                                                                                                                                                                   | -                    | 56                  | ogm[GRCh37]3p11.2(87449156_87754519)x1     |
| AML diagnosis (0d)           | 3    | 3    | 9782366         | 12785919      | 0.99       | deletion | NA          | 0.45 | 2962520       | 0                         | BRPF1;OGG1;CAMK1;AX748417;TADA3;TTLL3;RPU SD3;CIDEC;JAGN1;IL17RE;IL17RC;CRELD1;PRRT3;P RRT3-AS1;EMC3;AX747493;LOC401052;FW339974;FANCD 2;FANCD2OS;BRK1;VHL;IRAK2;TATDN2;LINC0085 2;GHRLOS;GHRL;SEC13;ATP2B2;MIR885;LINC00606 ;SLC6A11;SLC6A1;SLC6A1-AS1;HRH1;ATG7;AX748267;VGLL4;TAMM41;DQ583 118;SYN2;TIMP4;PPARG;TSEN2;C3orf83;MKRN2;RA F1;TMEM40 | BRPF1-TMEM40         | 90                  | ogm[GRCh37]3p25.3p25.2(9782366_12785919)x1 |
| AML diagnosis (0d)           | 4    | 4    | 40566455        | 40581577      | 0.99       | deletion | NA          | 0.54 | 7105          | 0.6                       | RBM47                                                                                                                                                                                                                                                                                                                                               | -                    | 111                 | ogm[GRCh37]4p14(40566455_40581577)x1       |
| AML diagnosis (0d)           | 7    | 7    | 62323427        | 62371140      | 0.99       | deletion | NA          | 0.7  | 5976          | 0.6                       | -                                                                                                                                                                                                                                                                                                                                                   | -                    | 64                  | ogm[GRCh37]7q11.21(62323427_62371140)x1    |
| AML diagnosis (0d)           | 7    | 7    | 9901592         | 9914178       | 0.99       | deletion | NA          | 0.45 | 5360          | 0                         | -                                                                                                                                                                                                                                                                                                                                                   | -                    | 140                 | ogm[GRCh37]7p21.3(9901592_9914178)x1       |

|                    |    |    |           |           |      |           |    |      |         |     |                                                                                                |   |     |                                              |
|--------------------|----|----|-----------|-----------|------|-----------|----|------|---------|-----|------------------------------------------------------------------------------------------------|---|-----|----------------------------------------------|
| AML diagnosis (0d) | 8  | 8  | 70319014  | 70333359  | 0.99 | deletion  | NA | 0.54 | 5338    | 0   | -                                                                                              | - | 144 | ogm[GRCh37]8q13.2(70319014_70333359)x1       |
| AML diagnosis (0d) | 9  | 9  | 128496517 | 128507523 | 0.99 | deletion  | NA | 0.71 | 5027    | 0   | -                                                                                              | - | 18  | ogm[GRCh37]9q33.3(128496517_128507523)x1     |
| AML diagnosis (0d) | 9  | 9  | 128501229 | 128507163 | 0.99 | deletion  | NA | 0.71 | 4380    | 0   | -                                                                                              | - | 144 | ogm[GRCh37]9q33.3(128501229_128507163)x1     |
| AML diagnosis (0d) | 9  | 9  | 65843777  | 65858302  | 0.99 | deletion  | NA | 0.41 | 11144   | 0.6 | -                                                                                              | - | 17  | ogm[GRCh37]9q12(65843777_65858302)x1         |
| AML diagnosis (0d) | 9  | 9  | 95167003  | 95268123  | 0.99 | deletion  | NA | 0.51 | 97459   | 0   | CENPP;OMD;ASP;ECM2                                                                             | - | 124 | ogm[GRCh37]9q22.31(95167003_95268123)x1      |
| AML diagnosis (0d) | 10 | 10 | 63429717  | 66057070  | 0.99 | deletion  | NA | 0.41 | 2621700 | 0   | C10orf107;ARID5B;MIR548AV;RTKN2;ZNF365;ADO;EGR2;NRBF2;JMJD1C;AX747628;MIR1296;JMJD1C-AS1;REEP3 | - | 77  | ogm[GRCh37]10q21.2q21.3(63429717_66057070)x1 |
| AML diagnosis (0d) | 16 | 16 | 23932554  | 23944177  | 0.99 | deletion  | NA | 0.64 | 8130    | 0.6 | PRKCB                                                                                          | - | 128 | ogm[GRCh37]16p12.2(23932554_23944177)x1      |
| AML diagnosis (0d) | 20 | 20 | 44336706  | 44386740  | 0.99 | deletion  | NA | 0.49 | 30726   | 0.6 | WFDC13;SPINT4                                                                                  | - | 112 | ogm[GRCh37]20q13.12(44336706_44386740)x1     |
| AML diagnosis (0d) | 21 | 21 | 47038229  | 47058698  | 0.99 | deletion  | NA | 0.33 | 6529    | 0   | -                                                                                              | - | 152 | ogm[GRCh37]21q22.3(47038229_47058698)x1      |
| AML diagnosis (0d) | 1  | 1  | 103781820 | 103795767 | 0.99 | insertion | NA | 0.11 | 62347   | 0   | -                                                                                              | - | 18  | ogm[GRCh37]ins(1;?)(p21.1;?)                 |
| AML diagnosis (0d) | 1  | 1  | 225379891 | 225394366 | 0.99 | insertion | NA | 0.58 | 5969    | 0   | DNAH14                                                                                         | - | 227 | ogm[GRCh37]ins(1;?)(q42.12;?)                |
| AML diagnosis (0d) | 2  | 2  | 234232954 | 234236530 | 0.99 | insertion | NA | 0.67 | 10670   | 0   | SAG                                                                                            | - | 175 | ogm[GRCh37]ins(2;?)(q37.1;?)                 |
| AML diagnosis (0d) | 3  | 3  | 139131709 | 139137532 | 0.99 | insertion | NA | 0.32 | 6047    | 0.6 | -                                                                                              | - | 110 | ogm[GRCh37]ins(3;?)(q23;?)                   |
| AML diagnosis (0d) | 5  | 5  | 33059463  | 33064516  | 0.99 | insertion | NA | 0.57 | 6440    | 0   | -                                                                                              | - | 182 | ogm[GRCh37]ins(5;?)(p13.3;?)                 |
| AML diagnosis (0d) | 6  | 6  | 124456554 | 124456554 | 0.99 | insertion | NA | 0.47 | 38227   | 0   | NKAIN2                                                                                         | - | 106 | ogm[GRCh37]ins(6;?)(q22.31;?)                |
| AML diagnosis (0d) | 6  | 6  | 40586940  | 40591956  | 0.99 | insertion | NA | 0.5  | 6141    | 0   | -                                                                                              | - | 155 | ogm[GRCh37]ins(6;?)(p21.1;?)                 |
| AML diagnosis (0d) | 7  | 7  | 102314052 | 102331912 | 0.99 | insertion | NA | 0.5  | 96614   | 0   | AK301666                                                                                       | - | 61  | ogm[GRCh37]ins(7;?)(q22.1;?)                 |
| AML diagnosis (0d) | 10 | 10 | 1272968   | 1284604   | 0.99 | insertion | NA | 0.52 | 76622   | 0   | ADARB2                                                                                         | - | 73  | ogm[GRCh37]ins(10;?)(p15.3;?)                |

|                    |    |    |           |           |      |                   |    |      |       |     |                                                                                                             |   |     |                                 |
|--------------------|----|----|-----------|-----------|------|-------------------|----|------|-------|-----|-------------------------------------------------------------------------------------------------------------|---|-----|---------------------------------|
| AML diagnosis (0d) | 10 | 10 | 18896114  | 18916103  | 0.99 | insertion         | NA | 0.47 | 10120 | 0   | NSUN6                                                                                                       | - | 153 | ogm[GRCh37] ins(10;?)(p12.31;?) |
| AML diagnosis (0d) | 10 | 10 | 47051136  | 47067228  | 0.99 | insertion         | NA | 0.03 | 10653 | 0   | -                                                                                                           | - | 16  | ogm[GRCh37] ins(10;?)(q11.22;?) |
| AML diagnosis (0d) | 11 | 11 | 4310787   | 4349873   | 0.99 | insertion         | NA | 0.49 | 96419 | 0.6 | -                                                                                                           | - | 76  | ogm[GRCh37] ins(11;?)(p15.4;?)  |
| AML diagnosis (0d) | 11 | 11 | 60986963  | 60995766  | 0.99 | insertion         | NA | 0.03 | 19188 | 0   | PGA4                                                                                                        | - | 13  | ogm[GRCh37] ins(11;?)(q12.2;?)  |
| AML diagnosis (0d) | 12 | 12 | 11541795  | 11550408  | 0.99 | insertion         | NA | 0.37 | 79648 | 0   | PRB2                                                                                                        | - | 165 | ogm[GRCh37] ins(12;?)(p13.2;?)  |
| AML diagnosis (0d) | 13 | 13 | 113309756 | 113329149 | 0.99 | insertion         | NA | 0.54 | 16412 | 0   | C13orf35                                                                                                    | - | 85  | ogm[GRCh37] ins(13;?)(q34;?)    |
| AML diagnosis (0d) | 19 | 19 | 53532751  | 53552487  | 0.99 | insertion         | NA | 0.81 | 35054 | 0   | ERVV-2                                                                                                      | - | 106 | ogm[GRCh37] ins(19;?)(q13.41;?) |
| AML diagnosis (0d) | 22 | 22 | 21845261  | 21864431  | 0.99 | insertion         | NA | 0.08 | 24888 | 0.6 | PI4KAP2                                                                                                     | - | 15  | ogm[GRCh37] ins(22;?)(q11.21;?) |
| AML diagnosis (0d) | 23 | 23 | 61787943  | 61878865  | 0.99 | insertion         | NA | 0.2  | 8585  | 0   | -                                                                                                           | - | 24  | ogm[GRCh37] ins(23;?)(q11.1;?)  |
| AML diagnosis (0d) | 1  | 1  | 155349797 | 155349797 | 0.99 | inversion         | NA | 0.11 | -1    | 0   | ASH1L                                                                                                       | - | 23  | ogm[GRCh37] inv(1)(q22q22)      |
| AML diagnosis (0d) | 1  | -1 | 155279255 | -1        | 0.99 | inversion_partial | NA | 0.11 | -1    | -1  | -                                                                                                           | - | -1  | ogm[GRCh37] inv(1)(q22q22)      |
| AML diagnosis (0d) | 3  | 3  | 5934692   | 6573492   | 0.98 | inversion         | NA | 0.37 | -1    | 0   | AF279782                                                                                                    | - | 97  | ogm[GRCh37] inv(3)(p26.1p26.1)  |
| AML diagnosis (0d) | 3  | -1 | 5856855   | -1        | 0.98 | inversion_partial | NA | 0.37 | -1    | -1  | -                                                                                                           | - | -1  | ogm[GRCh37] inv(3)(p26.1p26.1)  |
| AML diagnosis (0d) | 5  | 5  | 115959912 | 115959912 | 0.74 | inversion         | NA | 0.15 | -1    | 0   | -                                                                                                           | - | 97  | ogm[GRCh37] inv(5)(q23.1q23.1)  |
| AML diagnosis (0d) | 5  | -1 | 116077394 | -1        | 0.74 | inversion_partial | NA | 0.15 | -1    | -1  | -                                                                                                           | - | -1  | ogm[GRCh37] inv(5)(q23.1q23.1)  |
| AML diagnosis (0d) | 5  | 5  | 115959912 | 115959912 | 1    | inversion         | NA | 0.15 | -1    | 0   | -                                                                                                           | - | 6   | ogm[GRCh37] inv(5)(q23.1q23.1)  |
| AML diagnosis (0d) | 5  | -1 | 116046316 | -1        | 1    | inversion_partial | NA | 0.15 | -1    | -1  | -                                                                                                           | - | -1  | ogm[GRCh37] inv(5)(q23.1q23.1)  |
| AML diagnosis (0d) | 10 | 10 | 66823948  | 70459974  | 1    | inversion         | NA | 0.2  | -1    | 0   | CTNNA3;SnoU40;LRRTM3;H1650153;DNAJC12;U6;SI RT1;HERC4;MYPN;7SK;ATOH7;PBLD;HNRNPH3;R UFY2;DNA2;SLC25A16;TET1 | - | 76  | ogm[GRCh37] inv(10)(q21.3q21.3) |
| AML diagnosis (0d) | 10 | -1 | 70684134  | -1        | 1    | inversion_partial | NA | 0.2  | -1    | -1  | -                                                                                                           | - | -1  | ogm[GRCh37] inv(10)(q21.3q21.3) |
| AML diagnosis (0d) | 10 | 10 | 70699027  | 70736620  | 1    | inversion         | NA | 0.2  | -1    | 0   | DDX50;DDX21                                                                                                 | - | 66  | ogm[GRCh37] inv(10)(q22.1q22.1) |
| AML diagnosis (0d) | 10 | -1 | 70297175  | -1        | 1    | inversion_partial | NA | 0.2  | -1    | -1  | -                                                                                                           | - | -1  | ogm[GRCh37] inv(10)(q22.1q22.1) |

|                    |    |    |           |           |      |                        |     |      |    |    |                   |                   |     |                                   |
|--------------------|----|----|-----------|-----------|------|------------------------|-----|------|----|----|-------------------|-------------------|-----|-----------------------------------|
| AML diagnosis (0d) | 23 | 23 | 148956827 | 148956827 | 0.96 | inversion              | NA  | 0.13 | -1 | 0  | -                 | -                 | 15  | ogm[GRCh37] inv(23)(q28q28)       |
| AML diagnosis (0d) | 23 | -1 | 148659537 | -1        | 0.96 | inversion_partial      | NA  | 0.13 | -1 | -1 | -                 | -                 | -1  | ogm[GRCh37] inv(23)(q28q28)       |
| AML diagnosis (0d) | 1  | 17 | 154534329 | 1280603   | 0.96 | translocation_interchr | +/- | 0.06 | -1 | 0  | YWHAE             | -                 | 11  | ogm[GRCh37] t(1;17)(q21.3;p13.3)  |
| AML diagnosis (0d) | 1  | 11 | 155384865 | 3755020   | 0.87 | translocation_interchr | +/+ | 0.1  | -1 | 0  | ASH1L;NUP98       | ASH1L-NUP98       | 26  | ogm[GRCh37] t(1;11)(q22;p15.4)    |
| AML diagnosis (0d) | 3  | 10 | 12842453  | 17364994  | 0.26 | translocation_interchr | +/+ | 0.41 | -1 | 0  | CAND2;ST8SIA6     | CAND2-ST8SIA6     | 92  | ogm[GRCh37] t(3;10)(p25.2;p12.33) |
| AML diagnosis (0d) | 3  | 10 | 16344791  | 72152951  | 1    | translocation_interchr | +/+ | 0.45 | -1 | 0  | OXNAD1            | -                 | 117 | ogm[GRCh37] t(3;10)(p25.1;q22.1)  |
| AML diagnosis (0d) | 3  | 10 | 170076915 | 18677477  | 1    | translocation_interchr | +/+ | 0.23 | -1 | 0  | CACNB2            | -                 | 63  | ogm[GRCh37] t(3;10)(q26.2;p12.32) |
| AML diagnosis (0d) | 3  | 10 | 8383755   | 71718153  | 1    | translocation_interchr | +/+ | 0.22 | -1 | 0  | LMCD1-AS1;COL13A1 | LMCD1-AS1-COL13A1 | 40  | ogm[GRCh37] t(3;10)(p26.1;q22.1)  |
| AML diagnosis (0d) | 3  | 10 | 86634401  | 63706716  | 1    | translocation_interchr | +/+ | 0.44 | -1 | 0  | ARID5B            | -                 | 116 | ogm[GRCh37] t(3;10)(p12.1;q21.2)  |
| AML diagnosis (0d) | 3  | 10 | 87218114  | 19452703  | 0.96 | translocation_interchr | +/- | 0.21 | -1 | 0  | -                 | -                 | 38  | ogm[GRCh37] t(3;10)(p11.2;p12.31) |
| AML diagnosis (0d) | 3  | 10 | 87593525  | 42603355  | 0.19 | translocation_interchr | +/+ | 0.22 | -1 | 0  | -                 | -                 | 48  | ogm[GRCh37] t(3;10)(p11.2;q11.21) |
| AML diagnosis (0d) | 3  | 10 | 87594795  | 19216957  | 1    | translocation_interchr | -/+ | 0.21 | -1 | 0  | -                 | -                 | 47  | ogm[GRCh37] t(3;10)(p11.2;p12.31) |
| AML diagnosis (0d) | 3  | 10 | 9689847   | 72541265  | 0.99 | translocation_interchr | +/+ | 0.17 | -1 | 0  | TBATA             | -                 | 36  | ogm[GRCh37] t(3;10)(p25.3;q22.1)  |
| AML diagnosis (0d) | 3  | 10 | 9811091   | 17362391  | 0.89 | translocation_interchr | +/+ | 0.24 | -1 | 0  | CAMK1             | -                 | 27  | ogm[GRCh37] t(3;10)(p25.3;p12.33) |
| AML diagnosis (0d) | 3  | 10 | 9811823   | 17362391  | 0.94 | translocation_interchr | +/+ | 0.24 | -1 | 0  | -                 | -                 | 56  | ogm[GRCh37] t(3;10)(p25.3;p12.33) |
| AML diagnosis (0d) | 3  | 10 | 9821683   | 17362391  | 0.72 | translocation_interchr | +/+ | 0.24 | -1 | 0  | TADA3             | -                 | 10  | ogm[GRCh37] t(3;10)(p25.3;p12.33) |
| AML diagnosis (0d) | 3  | 10 | 9947565   | 62436894  | 0.86 | translocation_interchr | +/+ | 0.21 | -1 | 0  | IL17RE            | -                 | 41  | ogm[GRCh37] t(3;10)(p25.3;q21.2)  |
| AML diagnosis (0d) | 3  | 10 | 9954410   | 62436894  | 0.92 | translocation_interchr | +/+ | 0.21 | -1 | 0  | IL17RE            | -                 | 40  | ogm[GRCh37] t(3;10)(p25.3;q21.2)  |
| AML diagnosis (0d) | 5  | 10 | 132131355 | 75647791  | 1    | translocation_interchr | +/+ | 0.46 | -1 | 0  | -                 | -                 | 97  | ogm[GRCh37] t(5;10)(q31.1;q22.2)  |
| AML diagnosis (0d) | 5  | 17 | 167564781 | 77536514  | 0.22 | translocation_interchr | +/- | 0.79 | -1 | 0  | TENM2             | -                 | 189 | ogm[GRCh37] t(5;17)(q34;q25.3)    |
| AML diagnosis (0d) | 7  | 14 | 61676393  | 87129869  | 0.07 | translocation_interchr | +/- | 0.39 | -1 | 0  | -                 | -                 | 103 | ogm[GRCh37] t(7;14)(q11.1;q31.3)  |

|                        |    |    |           |           |      |                        |     |      |         |     |                                    |                 |     |                                              |
|------------------------|----|----|-----------|-----------|------|------------------------|-----|------|---------|-----|------------------------------------|-----------------|-----|----------------------------------------------|
| AML diagnosis (0d)     | 11 | 17 | 111925791 | 16219538  | 0.99 | translocation_interchr | -/+ | 0.09 | -1      | 0   | DLAT;PIGL                          | DLAT-PIGL       | 23  | ogm[GRCh37]<br>t(11;17)(q23.1;p11.2)         |
| AML diagnosis (0d)     | 1  | 1  | 150764470 | 203733734 | 0.94 | translocation_intrachr | +/+ | 0.09 | -1      | 0   | -                                  | -               | 17  | ogm[GRCh37]<br>fus(1;1)(q21.3;q32.1)         |
| AML diagnosis (0d)     | 3  | 3  | 19043437  | 85941272  | 1    | translocation_intrachr | +/+ | 0.47 | -1      | 0   | CADM2                              | -               | 126 | ogm[GRCh37]<br>fus(3;3)(p24.3;p12.1)         |
| AML diagnosis (0d)     | 3  | 3  | 5934692   | 87094899  | 0.52 | translocation_intrachr | +/+ | 0.31 | -1      | 0   | -                                  | -               | 86  | ogm[GRCh37]<br>fus(3;3)(p26.1;p12.1)         |
| AML diagnosis (0d)     | 10 | 10 | 17362391  | 62436894  | 0.95 | translocation_intrachr | +/+ | 0.22 | -1      | 0   | -                                  | -               | 41  | ogm[GRCh37]<br>fus(10;10)(p12.33;q21.2)      |
| AML diagnosis (0d)     | 6  | 6  | 115448373 | 115526974 | -1   | duplication            | NA  | 0.36 | 78602   | 0   | -                                  | -               | 89  | ogm[GRCh37]<br>dup(6)(q22.1q22.1)            |
| AML diagnosis (0d)     | 6  | 6  | 115449485 | 115556170 | -1   | duplication            | NA  | 0.36 | 106686  | 0   | -                                  | -               | 64  | ogm[GRCh37]<br>dup(6)(q22.1q22.1)            |
| AML diagnosis (0d)     | 7  | 7  | 143271389 | 143329948 | -1   | duplication            | NA  | 0.34 | 58560   | 0.6 | CTAGE15;DQ786304;FAM115C           | CTAGE15-FAM115C | 61  | ogm[GRCh37]<br>dup(7)(q35q35)                |
| AML diagnosis (0d)     | 5  | 5  | 115956150 | 116046316 | -1   | duplication_inverted   | NA  | 0.52 | 90167   | 0   | Mir_633                            | -               | 43  | ogm[GRCh37]<br>dup(5)(q23.1q23.1)            |
| AML diagnosis (0d)     | 5  | 5  | 115956150 | 116056399 | -1   | duplication_inverted   | NA  | 0.52 | 100250  | 0   | Mir_633                            | -               | 44  | ogm[GRCh37]<br>dup(5)(q23.1q23.1)            |
| AML diagnosis (0d)     | 11 | 11 | 4143061   | 4331668   | -1   | duplication_inverted   | NA  | 0.15 | 188608  | 0   | RRM1;LOC100506082                  | -               | 46  | ogm[GRCh37]<br>dup(11)(p15.4p15.4)           |
| AML diagnosis (0d)     | 23 | 23 | 148578211 | 148659537 | -1   | duplication_inverted   | NA  | 0.12 | 81327   | 0   | IDS;IDS2;LINC00893;CXorf40A        | -               | 42  | ogm[GRCh37]<br>dup(23)(q28q28)               |
| AML diagnosis (0d)     | 23 | 23 | 148679644 | 148737119 | -1   | duplication_inverted   | NA  | 0.13 | 57476   | 0   | TMEM185A                           | -               | 15  | ogm[GRCh37]<br>dup(23)(q28q28)               |
| AML diagnosis (0d)     | 3  | 3  | 87449930  | 88537466  | -1   | duplication_split      | NA  | 1    | 1087537 | 0   | U6atac;HTR1F;CGGBP1;ZNF654;C3orf38 | -               | 34  | ogm[GRCh37]<br>dup(3)(p11.2p11.1)            |
| AML diagnosis (0d)     | 7  | 7  | 61533417  | 61902991  | -1   | duplication_split      | NA  | 0.99 | 369575  | 0   | -                                  | -               | 6   | ogm[GRCh37]<br>dup(7)(q11.1q11.21)           |
| Prior alloHSCT (+155d) | 2  | 2  | 87083127  | 87097695  | 0.99 | deletion               | NA  | 0.74 | 4925    | 0   | RMND5A;CD8B;ANAPC1P1               | CD8B-ANAPC1P1   | 207 | ogm[GRCh37]<br>2p11.2(87083127_87097695)x1   |
| Prior alloHSCT (+155d) | 2  | 2  | 87083566  | 87097774  | 0.99 | deletion               | NA  | 0.74 | 4934    | 0   | RMND5A;CD8B;ANAPC1P1               | CD8B-ANAPC1P1   | 134 | ogm[GRCh37]<br>2p11.2(87083565_87097774)x1   |
| Prior alloHSCT (+155d) | 2  | 2  | 87083645  | 87097695  | 0.99 | deletion               | NA  | 0.74 | 4531    | 0   | RMND5A;CD8B;ANAPC1P1               | CD8B-ANAPC1P1   | 128 | ogm[GRCh37]<br>2p11.2(87083645_87097695)x1   |
| Prior alloHSCT (+155d) | 3  | 3  | 111554983 | 111585361 | 0.99 | deletion               | NA  | 0.56 | 16119   | 0   | PLCXD2;PHLDB2                      | PLCXD2-PHLDB2   | 280 | ogm[GRCh37]<br>3q13.2(111554983_111585361)x1 |

|                        |    |    |          |          |      |          |    |      |         |     |                                                                                                                                                                     |   |     |                                                 |
|------------------------|----|----|----------|----------|------|----------|----|------|---------|-----|---------------------------------------------------------------------------------------------------------------------------------------------------------------------|---|-----|-------------------------------------------------|
| Prior alloHSCT (+155d) | 4  | 4  | 40566455 | 40581577 | 0.99 | deletion | NA | 0.51 | 7078    | 0.6 | RBM47                                                                                                                                                               | - | 282 | ogm[GRCh37] 4p14(40566455_40581577)x1           |
| Prior alloHSCT (+155d) | 6  | 6  | 66238764 | 66266373 | 0.99 | deletion | NA | 0.89 | 2618    | 0   | EYS                                                                                                                                                                 | - | 55  | ogm[GRCh37] 6q12(66238764_66266373)x1           |
| Prior alloHSCT (+155d) | 7  | 7  | 62323427 | 62371140 | 0.99 | deletion | NA | 0.62 | 6054    | 0   | -                                                                                                                                                                   | - | 64  | ogm[GRCh37] 7q11.21(62323427_62371140)x1        |
| Prior alloHSCT (+155d) | 7  | 7  | 9901589  | 9914181  | 0.99 | deletion | NA | 0.52 | 5384    | 0   | -                                                                                                                                                                   | - | 142 | ogm[GRCh37] 7p21.3(9901588_9914181)x1           |
| Prior alloHSCT (+155d) | 7  | 7  | 9901592  | 9914178  | 0.99 | deletion | NA | 0.52 | 5344    | 0   | -                                                                                                                                                                   | - | 255 | ogm[GRCh37] 7p21.3(9901592_9914178)x1           |
| Prior alloHSCT (+155d) | 8  | 8  | 70319014 | 70333359 | 0.99 | deletion | NA | 0.48 | 5324    | 0.6 | -                                                                                                                                                                   | - | 257 | ogm[GRCh37] 8q13.2(70319014_70333359)x1         |
| Prior alloHSCT (+155d) | 9  | 9  | 46436460 | 46446136 | 0.99 | deletion | NA | 0.99 | 6079    | 0   | -                                                                                                                                                                   | - | 91  | ogm[GRCh37] 9p11.2(46436460_46446136)x1         |
| Prior alloHSCT (+155d) | 9  | 9  | 95167003 | 95268123 | 0.99 | deletion | NA | 0.5  | 97463   | 0   | CENPP;OMD;ASPN;ECM2                                                                                                                                                 | - | 184 | ogm[GRCh37] 9q22.31(95167003_95268123)x1        |
| Prior alloHSCT (+155d) | 10 | 10 | 63429717 | 66057070 | 0.99 | deletion | NA | 0.1  | 2621676 | 0   | C10orf107;ARID5B;MIR548AV;RTKN2;ZNF365;ADO;EGR2;NRBF2;JMJD1C;AX747628;MIR1296;JMJD1C-AS1;REEP3                                                                      | - | 37  | ogm[GRCh37] 10q21.2q21.3(63429717_66057070)x1   |
| Prior alloHSCT (+155d) | 13 | 13 | 65341820 | 65357226 | 0.99 | deletion | NA | 0.47 | 3756    | 0   | -                                                                                                                                                                   | - | 256 | ogm[GRCh37] 13q21.31(65341820_65357226)x1       |
| Prior alloHSCT (+155d) | 16 | 16 | 23931090 | 23940422 | 0.99 | deletion | NA | 0.48 | 7787    | 0.6 | PRKCB                                                                                                                                                               | - | 196 | ogm[GRCh37] 16p12.2(23931090_23940422)x1        |
| Prior alloHSCT (+155d) | 16 | 16 | 23932554 | 23944177 | 0.99 | deletion | NA | 0.48 | 8121    | 0.6 | PRKCB                                                                                                                                                               | - | 205 | ogm[GRCh37] 16p12.2(23932554_23944177)x1        |
| Prior alloHSCT (+155d) | 20 | 20 | 44203215 | 44209690 | 0.99 | deletion | NA | 0.48 | 3180    | 0   | WFDC8                                                                                                                                                               | - | 286 | ogm[GRCh37] 20q13.12(44203215_44209690)x1       |
| Prior alloHSCT (+155d) | 20 | 20 | 44336706 | 44386740 | 0.99 | deletion | NA | 0.51 | 30686   | 0.6 | WFDC13;SPINT4                                                                                                                                                       | - | 175 | ogm[GRCh37] 20q13.12(44336706_44386740)x1       |
| Prior alloHSCT (+155d) | 21 | 21 | 34403641 | 36841365 | 0.99 | deletion | NA | 0.01 | 2420410 | 0   | OLIG1;C21orf54;IFNAR2;IL10RB-AS1;IFNAR1;IFNGR2;TMEM50B;TMEM50B;DNAJC28;GART;SON;DONSON;CRYZL1;ITSN1;intersectin 1 long form;LINC00649;SLC5A3;MRPS6;LINC00310;KCNE2; | - | 5   | ogm[GRCh37] 21q22.11q22.12(34403641_36841365)x1 |

|                        |    |    |           |           |      |           |    |      |       |     |                                                                                                                 |   |     |                                         |
|------------------------|----|----|-----------|-----------|------|-----------|----|------|-------|-----|-----------------------------------------------------------------------------------------------------------------|---|-----|-----------------------------------------|
|                        |    |    |           |           |      |           |    |      |       |     | SMIM11;BC049386;KCNE1;RCAN1;Mir_562;CLIC6;LIN000160;LOC100506385;RUNX1;AX746823;AX813477;RUNX1-IT1;LOC100506403 |   |     |                                         |
| Prior alloHSCT (+155d) | 21 | 21 | 47038229  | 47058698  | 0.99 | deletion  | NA | 0.62 | 6472  | 0   | -                                                                                                               | - | 232 | ogm[GRCh37]21q22.3(47038229_47058698)x1 |
| Prior alloHSCT (+155d) | 1  | 1  | 225388244 | 225394366 | 0.99 | insertion | NA | 0.48 | 6105  | 0   | DNAH14                                                                                                          | - | 349 | ogm[GRCh37]ins(1;?)(q42.12;?)           |
| Prior alloHSCT (+155d) | 2  | 2  | 136581892 | 136613712 | 0.99 | insertion | NA | 0.31 | 4539  | 0.6 | LCT;MCM6                                                                                                        | - | 106 | ogm[GRCh37]ins(2;?)(q21.3;?)            |
| Prior alloHSCT (+155d) | 2  | 2  | 234232954 | 234236530 | 0.99 | insertion | NA | 0.63 | 10696 | 0   | SAG                                                                                                             | - | 259 | ogm[GRCh37]ins(2;?)(q37.1;?)            |
| Prior alloHSCT (+155d) | 2  | 2  | 298743    | 310577    | 0.99 | insertion | NA | 0.62 | 3613  | 0.6 | -                                                                                                               | - | 327 | ogm[GRCh37]ins(2;?)(p25.3;?)            |
| Prior alloHSCT (+155d) | 3  | 3  | 139131709 | 139137532 | 0.99 | insertion | NA | 0.49 | 6084  | 0.6 | -                                                                                                               | - | 321 | ogm[GRCh37]ins(3;?)(q23;?)              |
| Prior alloHSCT (+155d) | 3  | 3  | 195820356 | 195840292 | 0.99 | insertion | NA | 0.46 | 4780  | 0.6 | -                                                                                                               | - | 49  | ogm[GRCh37]ins(3;?)(q29;?)              |
| Prior alloHSCT (+155d) | 3  | 3  | 195820356 | 195840886 | 0.99 | insertion | NA | 0.46 | 4098  | 0.6 | -                                                                                                               | - | 190 | ogm[GRCh37]ins(3;?)(q29;?)              |
| Prior alloHSCT (+155d) | 5  | 5  | 1837315   | 1872381   | 0.99 | insertion | NA | 0.61 | 4926  | 0.6 | -                                                                                                               | - | 209 | ogm[GRCh37]ins(5;?)(p15.33;?)           |
| Prior alloHSCT (+155d) | 5  | 5  | 33059463  | 33064516  | 0.99 | insertion | NA | 0.51 | 6508  | 0   | -                                                                                                               | - | 342 | ogm[GRCh37]ins(5;?)(p13.3;?)            |
| Prior alloHSCT (+155d) | 6  | 6  | 30435443  | 30440786  | 0.99 | insertion | NA | 0.48 | 4922  | 0   | -                                                                                                               | - | 239 | ogm[GRCh37]ins(6;?)(p21.33;?)           |
| Prior alloHSCT (+155d) | 6  | 6  | 31338429  | 31358385  | 0.99 | insertion | NA | 0.56 | 98043 | 0   | -                                                                                                               | - | 103 | ogm[GRCh37]ins(6;?)(p21.33;?)           |
| Prior alloHSCT (+155d) | 6  | 6  | 40586940  | 40591956  | 0.99 | insertion | NA | 0.49 | 6145  | 0   | -                                                                                                               | - | 281 | ogm[GRCh37]ins(6;?)(p21.1;?)            |
| Prior alloHSCT (+155d) | 7  | 7  | 102314052 | 102331912 | 0.99 | insertion | NA | 0.24 | 3815  | 0   | AK301666                                                                                                        | - | 77  | ogm[GRCh37]ins(7;?)(q22.1;?)            |
| Prior alloHSCT (+155d) | 8  | 8  | 12215199  | 12245552  | 0.99 | insertion | NA | 0.2  | 4043  | 0   | ZNF705A;LOC649352                                                                                               | - | 81  | ogm[GRCh37]ins(8;?)(p23.1;?)            |
| Prior alloHSCT (+155d) | 10 | 10 | 1272968   | 1284604   | 0.99 | insertion | NA | 0.51 | 76648 | 0   | ADARB2                                                                                                          | - | 89  | ogm[GRCh37]ins(10;?)(p15.3;?)           |
| Prior alloHSCT (+155d) | 10 | 10 | 18896114  | 18916103  | 0.99 | insertion | NA | 0.49 | 10096 | 0   | NSUN6                                                                                                           | - | 279 | ogm[GRCh37]ins(10;?)(p12.31;?)          |
| Prior alloHSCT (+155d) | 13 | 13 | 113309756 | 113329149 | 0.99 | insertion | NA | 0.45 | 16496 | 0   | C13orf35                                                                                                        | - | 174 | ogm[GRCh37]ins(13;?)(q34;?)             |
| Prior alloHSCT (+155d) | 1  | 1  | 155349797 | 155349797 | 1    | inversion | NA | 0.04 | -1    | 0.6 | ASH1L                                                                                                           | - | 14  | ogm[GRCh37]inv(1)(q22q22)               |



|                        |    |    |           |           |      |                        |     |      |    |    |                                                                                                           |                   |     |                                   |
|------------------------|----|----|-----------|-----------|------|------------------------|-----|------|----|----|-----------------------------------------------------------------------------------------------------------|-------------------|-----|-----------------------------------|
| Prior alloHSCT (+155d) | 1  | -1 | 155279255 | -1        | 1    | inversion_partial      | NA  | 0.04 | -1 | -1 | -                                                                                                         | -                 | -1  | ogm[GRCh37] inv(1)(q22q22)        |
| Prior alloHSCT (+155d) | 3  | 3  | 5935872   | 6573492   | 0.99 | inversion              | NA  | 0.04 | -1 | 0  | AF279782                                                                                                  | -                 | 10  | ogm[GRCh37] inv(3)(p26.1p26.1)    |
| Prior alloHSCT (+155d) | 3  | -1 | 5856855   | -1        | 0.99 | inversion_partial      | NA  | 0.04 | -1 | -1 | -                                                                                                         | -                 | -1  | ogm[GRCh37] inv(3)(p26.1p26.1)    |
| Prior alloHSCT (+155d) | 5  | 5  | 115974899 | 115974899 | 0.9  | inversion              | NA  | 0.15 | -1 | 0  | -                                                                                                         | -                 | 27  | ogm[GRCh37] inv(5)(q23.1q23.1)    |
| Prior alloHSCT (+155d) | 5  | -1 | 116062655 | -1        | 0.9  | inversion_partial      | NA  | 0.15 | -1 | -1 | -                                                                                                         | -                 | -1  | ogm[GRCh37] inv(5)(q23.1q23.1)    |
| Prior alloHSCT (+155d) | 10 | 10 | 66823948  | 70478435  | 1    | inversion              | NA  | 0.08 | -1 | 0  | CTNNA3;SnoU40;LRRTM3;HI650153;DNAJC12;U6;SIRT1;HERC4;MYPN;7SK;ATOH7;PBLD;HNRNPH3;RUFY2;DNA2;SLC25A16;TET1 | -                 | 26  | ogm[GRCh37] inv(10)(q21.3q21.3)   |
| Prior alloHSCT (+155d) | 10 | -1 | 70700810  | -1        | 1    | inversion_partial      | NA  | 0.08 | -1 | -1 | -                                                                                                         | -                 | -1  | ogm[GRCh37] inv(10)(q21.3q21.3)   |
| Prior alloHSCT (+155d) | 10 | 10 | 70544201  | 70736620  | 1    | inversion              | NA  | 0.17 | -1 | 0  | CCAR1;STOX1;DDX50;DDX21                                                                                   | -                 | 24  | ogm[GRCh37] inv(10)(q21.3q22.1)   |
| Prior alloHSCT (+155d) | 10 | -1 | 70297175  | -1        | 1    | inversion_partial      | NA  | 0.17 | -1 | -1 | -                                                                                                         | -                 | -1  | ogm[GRCh37] inv(10)(q21.3q22.1)   |
| Prior alloHSCT (+155d) | 1  | 11 | 155384865 | 3755020   | 0.69 | translocation_interchr | +/+ | 0.05 | -1 | 0  | ASH1L;NUP98                                                                                               | ASH1L-NUP98       | 20  | ogm[GRCh37] t(1;11)(q22;p15.4)    |
| Prior alloHSCT (+155d) | 3  | 10 | 16344791  | 72152951  | 0.99 | translocation_interchr | +/+ | 0.13 | -1 | 0  | OXNAD1                                                                                                    | -                 | 23  | ogm[GRCh37] t(3;10)(p25.1;q22.1)  |
| Prior alloHSCT (+155d) | 3  | 10 | 8383755   | 71718153  | 0.97 | translocation_interchr | +/+ | 0.08 | -1 | 0  | LMCD1-AS1;COL13A1                                                                                         | LMCD1-AS1-COL13A1 | 26  | ogm[GRCh37] t(3;10)(p26.1;q22.1)  |
| Prior alloHSCT (+155d) | 3  | 10 | 86013858  | 63895519  | 0.6  | translocation_interchr | +/+ | 0.01 | -1 | 0  | CADM2                                                                                                     | -                 | 6   | ogm[GRCh37] t(3;10)(p12.1;q21.2)  |
| Prior alloHSCT (+155d) | 3  | 10 | 86634401  | 63706716  | 0.99 | translocation_interchr | +/+ | 0.08 | -1 | 0  | ARID5B                                                                                                    | -                 | 20  | ogm[GRCh37] t(3;10)(p12.1;q21.2)  |
| Prior alloHSCT (+155d) | 5  | 10 | 132131355 | 75647791  | 0.98 | translocation_interchr | +/+ | 0.09 | -1 | 0  | -                                                                                                         | -                 | 23  | ogm[GRCh37] t(5;10)(q31.1;q22.2)  |
| Prior alloHSCT (+155d) | 7  | 17 | 154456988 | 27326038  | 0.2  | translocation_interchr | +/+ | 0.26 | -1 | 0  | DPP6;SEZ6                                                                                                 | DPP6-SEZ6         | 168 | ogm[GRCh37] t(7;17)(q36.2;q11.2)  |
| Prior alloHSCT (+155d) | 3  | 3  | 5935872   | 87094899  | 0.5  | translocation_intrachr | +/+ | 0.04 | -1 | 0  | -                                                                                                         | -                 | 13  | ogm[GRCh37] fus(3;3)(p26.1;p12.1) |
| Prior alloHSCT (+155d) | 3  | 3  | 7921134   | 15366443  | 0.92 | translocation_intrachr | -/+ | 0.02 | -1 | 0  | SH3BP5                                                                                                    | -                 | 7   | ogm[GRCh37] fus(3;3)(p26.1;p25.1) |
| Prior alloHSCT (+155d) | 3  | 3  | 11711969  | 141424983 | 0.15 | translocation_intrachr | -/+ | 0.02 | -1 | 0  | -                                                                                                         | -                 | 6   | ogm[GRCh37] fus(3;3)(p25.3;q23)   |
| Prior alloHSCT (+155d) | 3  | 3  | 19043437  | 85941272  | 0.99 | translocation_intrachr | +/+ | 0.09 | -1 | 0  | CADM2                                                                                                     | -                 | 30  | ogm[GRCh37] fus(3;3)(p24.3;p12.1) |

|                        |   |   |           |           |      |                      |    |      |        |     |                 |                   |     |                                              |
|------------------------|---|---|-----------|-----------|------|----------------------|----|------|--------|-----|-----------------|-------------------|-----|----------------------------------------------|
| Prior alloHSCT (+155d) | 6 | 6 | 115447157 | 115556170 | -1   | duplication          | NA | 0.06 | 109014 | 0   | -               | -                 | 19  | ogm[GRCh37]<br>dup(6)(q22.1q22.1)            |
| Prior alloHSCT (+155d) | 6 | 6 | 124433875 | 124456554 | -1   | duplication          | NA | 0.46 | 22680  | 0   | NKAIN2          | -                 | 61  | ogm[GRCh37]<br>dup(6)(q22.31q22.31)          |
| Prior alloHSCT (+155d) | 5 | 5 | 115956150 | 116056399 | -1   | duplication_inverted | NA | 0.49 | 100250 | 0   | Mir_633         | -                 | 86  | ogm[GRCh37]<br>dup(5)(q23.1q23.1)            |
| Relapse (+225d)        | 1 | 1 | 182773347 | 182793139 | 0.99 | deletion             | NA | 0.19 | 5368   | 0.6 | NPL             | -                 | 242 | ogm[GRCh37]<br>1q25.3(182773347_182793139)x1 |
| Relapse (+225d)        | 1 | 1 | 73007503  | 73093313  | 0.99 | deletion             | NA | 0.23 | 82366  | 0   | -               | -                 | 77  | ogm[GRCh37]<br>1p31.1(73007503_73093313)x1   |
| Relapse (+225d)        | 3 | 3 | 111554983 | 111585361 | 0.99 | deletion             | NA | 0.3  | 16165  | 0   | PLCXD2;PHLDB2   | PLCXD2-<br>PHLDB2 | 218 | ogm[GRCh37]<br>3q13.2(111554983_111585361)x1 |
| Relapse (+225d)        | 3 | 3 | 18296458  | 18515116  | 0.97 | deletion             | NA | 0.01 | 211886 | 0   | LOC339862;SATB1 | -                 | 6   | ogm[GRCh37]<br>3p24.3(18296457_18515116)x1   |
| Relapse (+225d)        | 3 | 3 | 39760310  | 39781339  | 0.99 | deletion             | NA | 0.36 | 17617  | 0   | -               | -                 | 216 | ogm[GRCh37]<br>3p22.1(39760310_39781339)x1   |
| Relapse (+225d)        | 4 | 4 | 40566455  | 40581577  | 0.99 | deletion             | NA | 0.29 | 7104   | 0.6 | RBM47           | -                 | 202 | ogm[GRCh37]<br>4p14(40566455_40581577)x1     |
| Relapse (+225d)        | 5 | 5 | 21603512  | 21620550  | 0.99 | deletion             | NA | 0.19 | 3283   | 0.6 | BC038535        | -                 | 68  | ogm[GRCh37]<br>5p14.3(21603511_21620549)x1   |
| Relapse (+225d)        | 6 | 6 | 16563958  | 16575942  | 0.99 | deletion             | NA | 0.29 | 5628   | 0   | ATXN1           | -                 | 186 | ogm[GRCh37]<br>6p22.3(16563958_16575941)x1   |
| Relapse (+225d)        | 7 | 7 | 62323427  | 62371140  | 0.99 | deletion             | NA | 0.4  | 6008   | 0   | -               | -                 | 45  | ogm[GRCh37]<br>7q11.21(62323427_62371140)x1  |
| Relapse (+225d)        | 7 | 7 | 8881992   | 8897787   | 0.99 | deletion             | NA | 0.27 | 6964   | 0   | -               | -                 | 166 | ogm[GRCh37]<br>7p21.3(8881992_8897787)x1     |
| Relapse (+225d)        | 7 | 7 | 9901592   | 9914178   | 0.99 | deletion             | NA | 0.25 | 5409   | 0   | -               | -                 | 161 | ogm[GRCh37]<br>7p21.3(9901592_9914178)x1     |
| Relapse (+225d)        | 8 | 8 | 70319014  | 70333359  | 0.99 | deletion             | NA | 0.24 | 5348   | 0.6 | -               | -                 | 289 | ogm[GRCh37]<br>8q13.2(70319014_70333359)x1   |
| Relapse (+225d)        | 8 | 8 | 72213283  | 72218721  | 0.99 | deletion             | NA | 0.43 | 3084   | 0   | EYA1            | -                 | 243 | ogm[GRCh37]<br>8q13.3(72213283_72218721)x1   |

|                 |    |    |           |           |      |           |    |      |         |     |                                                                                                |   |     |                                                  |
|-----------------|----|----|-----------|-----------|------|-----------|----|------|---------|-----|------------------------------------------------------------------------------------------------|---|-----|--------------------------------------------------|
| Relapse (+225d) | 9  | 9  | 67000179  | 67044327  | 0.99 | deletion  | NA | 0.15 | 27700   | 0.6 | LOC286297                                                                                      | - | 12  | ogm[GRCh37]<br>9q13(67000178_67044327)x1         |
| Relapse (+225d) | 9  | 9  | 95167003  | 95268123  | 0.99 | deletion  | NA | 0.22 | 97409   | 0   | CENPP;OMD;ASPN;ECM2                                                                            | - | 90  | ogm[GRCh37]<br>9q22.31(95167003_95268123)x1      |
| Relapse (+225d) | 10 | 10 | 63429717  | 66057070  | 0.99 | deletion  | NA | 0.37 | 2621687 | 0   | C10orf107;ARID5B;MIR548AV;RTKN2;ZNF365;ADO;EGR2;NRBF2;JMJD1C;AX747628;MIR1296;JMJD1C-AS1;REEP3 | - | 203 | ogm[GRCh37]<br>10q21.2q21.3(63429717_66057070)x1 |
| Relapse (+225d) | 10 | 10 | 65959767  | 66724105  | 0.99 | deletion  | NA | 0.01 | 656533  | 0   | ANXA2P3;DJ439558;DJ439576;DJ439561                                                             | - | 5   | ogm[GRCh37]<br>10q21.3(65959767_66724105)x1      |
| Relapse (+225d) | 11 | 11 | 21834510  | 21955750  | 0.99 | deletion  | NA | 0.06 | 114015  | 0   | -                                                                                              | - | 7   | ogm[GRCh37]<br>11p14.3(21834510_21955750)x1      |
| Relapse (+225d) | 16 | 16 | 23932554  | 23944177  | 0.99 | deletion  | NA | 0.25 | 8141    | 0.6 | PRKCB                                                                                          | - | 166 | ogm[GRCh37]<br>16p12.2(23932554_23944177)x1      |
| Relapse (+225d) | 16 | 16 | 23932554  | 23944177  | 0.99 | deletion  | NA | 0.25 | 8150    | 0.6 | PRKCB                                                                                          | - | 158 | ogm[GRCh37]<br>16p12.2(23932554_23944177)x1      |
| Relapse (+225d) | 16 | 16 | 4118206   | 4148313   | 0.99 | deletion  | NA | 0.29 | 6848    | 0   | ADCY9                                                                                          | - | 193 | ogm[GRCh37]<br>16p13.3(4118206_4148312)x1        |
| Relapse (+225d) | 18 | 18 | 7914268   | 8116237   | 0.99 | deletion  | NA | 0.26 | 197730  | 0   | PTPRM                                                                                          | - | 100 | ogm[GRCh37]<br>18p11.23(7914268_8116237)x1       |
| Relapse (+225d) | 20 | 20 | 44203215  | 44209690  | 0.99 | deletion  | NA | 0.19 | 3185    | 0   | WFDC8                                                                                          | - | 131 | ogm[GRCh37]<br>20q13.12(44203215_44209690)x1     |
| Relapse (+225d) | 20 | 20 | 44336706  | 44386740  | 0.99 | deletion  | NA | 0.25 | 30747   | 0.6 | WFDC13;SPINT4                                                                                  | - | 85  | ogm[GRCh37]<br>20q13.12(44336706_44386740)x1     |
| Relapse (+225d) | 21 | 21 | 47038229  | 47058698  | 0.99 | deletion  | NA | 0.34 | 6482    | 0   | -                                                                                              | - | 195 | ogm[GRCh37]<br>21q22.3(47038229_47058698)x1      |
| Relapse (+225d) | 23 | 23 | 113347567 | 113361950 | 0.99 | deletion  | NA | 0.3  | 7225    | 0.6 | -                                                                                              | - | 232 | ogm[GRCh37]<br>23q23(113347567_113361949)x1      |
| Relapse (+225d) | 1  | 1  | 225388244 | 225394366 | 0.99 | insertion | NA | 0.4  | 6220    | 0   | DNAH14                                                                                         | - | 415 | ogm[GRCh37]<br>ins(1;?)(q42.12;?)                |
| Relapse (+225d) | 1  | 1  | 23152779  | 23164560  | 0.99 | insertion | NA | 0.22 | 6186    | 0.6 | EPHB2                                                                                          | - | 119 | ogm[GRCh37]<br>ins(1;?)(p36.12;?)                |
| Relapse (+225d) | 2  | 2  | 234232954 | 234236530 | 0.99 | insertion | NA | 0.32 | 10610   | 0   | SAG                                                                                            | - | 275 | ogm[GRCh37]<br>ins(2;?)(q37.1;?)                 |

|                 |    |    |           |           |      |                   |    |      |       |     |                          |   |     |                                    |
|-----------------|----|----|-----------|-----------|------|-------------------|----|------|-------|-----|--------------------------|---|-----|------------------------------------|
| Relapse (+225d) | 3  | 3  | 139131709 | 139137532 | 0.99 | insertion         | NA | 0.31 | 6061  | 0.6 | -                        | - | 341 | ogm[GRCh37]<br>ins(3;?)(q23;?)     |
| Relapse (+225d) | 3  | 3  | 195820356 | 195839697 | 0.99 | insertion         | NA | 0.59 | 4531  | 0.6 | -                        | - | 300 | ogm[GRCh37]<br>ins(3;?)(q29;?)     |
| Relapse (+225d) | 3  | 3  | 195820356 | 195840292 | 0.99 | insertion         | NA | 0.59 | 3967  | 0.6 | -                        | - | 33  | ogm[GRCh37]<br>ins(3;?)(q29;?)     |
| Relapse (+225d) | 4  | 4  | 120735721 | 120744497 | 0.99 | insertion         | NA | 0.27 | 6100  | 0.6 | -                        | - | 237 | ogm[GRCh37]<br>ins(4;?)(q26;?)     |
| Relapse (+225d) | 5  | 5  | 1837283   | 1872413   | 0.99 | insertion         | NA | 0.5  | 4935  | 0.6 | -                        | - | 171 | ogm[GRCh37]<br>ins(5;?)(p15.33;?)  |
| Relapse (+225d) | 5  | 5  | 33059463  | 33064516  | 0.99 | insertion         | NA | 0.27 | 6463  | 0   | -                        | - | 253 | ogm[GRCh37]<br>ins(5;?)(p13.3;?)   |
| Relapse (+225d) | 5  | 5  | 527789    | 574944    | 0.99 | insertion         | NA | 0.25 | 3354  | 0.6 | MIR4456                  | - | 51  | ogm[GRCh37]<br>ins(5;?)(p15.33;?)  |
| Relapse (+225d) | 6  | 6  | 30435443  | 30440786  | 0.99 | insertion         | NA | 0.46 | 4841  | 0   | -                        | - | 151 | ogm[GRCh37]<br>ins(6;?)(p21.33;?)  |
| Relapse (+225d) | 6  | 6  | 31433503  | 31443800  | 0.99 | insertion         | NA | 0.28 | 94426 | 0   | HCP5;HCG26               | - | 89  | ogm[GRCh37]<br>ins(6;?)(p21.33;?)  |
| Relapse (+225d) | 6  | 6  | 40586940  | 40591956  | 0.99 | insertion         | NA | 0.28 | 6148  | 0   | -                        | - | 260 | ogm[GRCh37]<br>ins(6;?)(p21.1;?)   |
| Relapse (+225d) | 8  | 8  | 7051958   | 7069891   | 0.99 | insertion         | NA | 0.12 | 5875  | 0.6 | -                        | - | 26  | ogm[GRCh37]<br>ins(8;?)(p23.1;?)   |
| Relapse (+225d) | 10 | 10 | 1272968   | 1284604   | 0.99 | insertion         | NA | 0.36 | 76579 | 0   | ADARB2                   | - | 83  | ogm[GRCh37]<br>ins(10;?)(p15.3;?)  |
| Relapse (+225d) | 10 | 10 | 18896114  | 18916103  | 0.99 | insertion         | NA | 0.4  | 10060 | 0   | NSUN6                    | - | 293 | ogm[GRCh37]<br>ins(10;?)(p12.31;?) |
| Relapse (+225d) | 11 | 11 | 43151429  | 43153757  | 0.99 | insertion         | NA | 0.23 | 6190  | 0   | -                        | - | 122 | ogm[GRCh37]<br>ins(11;?)(p12;?)    |
| Relapse (+225d) | 13 | 13 | 113309756 | 113329149 | 0.99 | insertion         | NA | 0.34 | 16528 | 0   | C13orf35                 | - | 136 | ogm[GRCh37]<br>ins(13;?)(q34;?)    |
| Relapse (+225d) | 13 | 13 | 90309287  | 90323108  | 0.99 | insertion         | NA | 0.73 | 4385  | 0.6 | -                        | - | 187 | ogm[GRCh37]<br>ins(13;?)(q31.3;?)  |
| Relapse (+225d) | 1  | 1  | 155349797 | 155349797 | 1    | inversion         | NA | 0.2  | -1    | 0.6 | ASH1L                    | - | 26  | ogm[GRCh37]<br>inv(1)(q22q22)      |
| Relapse (+225d) | 1  | -1 | 155278172 | -1        | 1    | inversion_partial | NA | 0.2  | -1    | -1  | -                        | - | -1  | ogm[GRCh37]<br>inv(1)(q22q22)      |
| Relapse (+225d) | 1  | 1  | 155349797 | 155349797 | 1    | inversion         | NA | 0.2  | -1    | 0.6 | ASH1L                    | - | 84  | ogm[GRCh37]<br>inv(1)(q22q22)      |
| Relapse (+225d) | 1  | -1 | 155279255 | -1        | 1    | inversion_partial | NA | 0.2  | -1    | -1  | -                        | - | -1  | ogm[GRCh37]<br>inv(1)(q22q22)      |
| Relapse (+225d) | 3  | 3  | 16752942  | 17864305  | 1    | inversion         | NA | 0.01 | -1    | 0   | PLCL2;TBC1D5;TRNA_Pseudo | - | 5   | ogm[GRCh37]<br>inv(3)(p24.3p24.3)  |

|                 |    |    |           |           |      |                        |     |      |    |    |                                                                                                                         |                   |     |                                     |
|-----------------|----|----|-----------|-----------|------|------------------------|-----|------|----|----|-------------------------------------------------------------------------------------------------------------------------|-------------------|-----|-------------------------------------|
| Relapse (+225d) | 3  | -1 | 17946841  | -1        | 1    | inversion_partial      | NA  | 0.01 | -1 | -1 | -                                                                                                                       | -                 | -1  | ogm[GRCh37]<br>inv(3)(p24.3p24.3)   |
| Relapse (+225d) | 3  | 3  | 5935872   | 6573492   | 0.96 | inversion              | NA  | 0.14 | -1 | 0  | AF279782                                                                                                                | -                 | 35  | ogm[GRCh37]<br>inv(3)(p26.1p26.1)   |
| Relapse (+225d) | 3  | -1 | 5856855   | -1        | 0.96 | inversion_partial      | NA  | 0.14 | -1 | -1 | -                                                                                                                       | -                 | -1  | ogm[GRCh37]<br>inv(3)(p26.1p26.1)   |
| Relapse (+225d) | 5  | 5  | 115945474 | 115956150 | 1    | inversion              | NA  | 0.21 | -1 | 0  | -                                                                                                                       | -                 | 60  | ogm[GRCh37]<br>inv(5)(q23.1q23.1)   |
| Relapse (+225d) | 5  | -1 | 116088873 | -1        | 1    | inversion_partial      | NA  | 0.21 | -1 | -1 | -                                                                                                                       | -                 | -1  | ogm[GRCh37]<br>inv(5)(q23.1q23.1)   |
| Relapse (+225d) | 5  | 5  | 115959912 | 115969748 | 1    | inversion              | NA  | 0.21 | -1 | 0  | -                                                                                                                       | -                 | 7   | ogm[GRCh37]<br>inv(5)(q23.1q23.1)   |
| Relapse (+225d) | 5  | -1 | 116077394 | -1        | 1    | inversion_partial      | NA  | 0.21 | -1 | -1 | -                                                                                                                       | -                 | -1  | ogm[GRCh37]<br>inv(5)(q23.1q23.1)   |
| Relapse (+225d) | 10 | 10 | 64177328  | 64462742  | 1    | inversion              | NA  | 0.07 | -1 | 0  | ZNF365                                                                                                                  | -                 | 10  | ogm[GRCh37]<br>inv(10)(q21.2q21.2)  |
| Relapse (+225d) | 10 | -1 | 64004769  | -1        | 1    | inversion_partial      | NA  | 0.07 | -1 | -1 | -                                                                                                                       | -                 | -1  | ogm[GRCh37]<br>inv(10)(q21.2q21.2)  |
| Relapse (+225d) | 10 | 10 | 66823948  | 70495589  | 0.99 | inversion              | NA  | 0.3  | -1 | 0  | CTNNA3;SnoU40;LRRTM3;HI650153;DNAJC12;U6;SI<br>RT1;HERC4;MYPN;7SK;ATOH7;PBLD;HNRNPH3;R<br>UFY2;DNA2;SLC25A16;TET1;CCAR1 | -                 | 153 | ogm[GRCh37]<br>inv(10)(q21.3q21.3)  |
| Relapse (+225d) | 10 | -1 | 70700810  | -1        | 0.99 | inversion_partial      | NA  | 0.3  | -1 | -1 | -                                                                                                                       | -                 | -1  | ogm[GRCh37]<br>inv(10)(q21.3q21.3)  |
| Relapse (+225d) | 10 | 10 | 70495589  | 70736620  | 0.75 | inversion              | NA  | 0.19 | -1 | 0  | CCAR1;SNORD98;STOX1;DDX50;DDX21                                                                                         | -                 | 104 | ogm[GRCh37]<br>inv(10)(q21.3q22.1)  |
| Relapse (+225d) | 10 | -1 | 70297175  | -1        | 0.75 | inversion_partial      | NA  | 0.19 | -1 | -1 | -                                                                                                                       | -                 | -1  | ogm[GRCh37]<br>inv(10)(q21.3q22.1)  |
| Relapse (+225d) | 10 | 10 | 70597919  | 70740707  | 1    | inversion              | NA  | 0.19 | -1 | 0  | STOX1;DDX50;DDX21                                                                                                       | -                 | 7   | ogm[GRCh37]<br>inv(10)(q21.3q22.1)  |
| Relapse (+225d) | 10 | -1 | 70436832  | -1        | 1    | inversion_partial      | NA  | 0.19 | -1 | -1 | -                                                                                                                       | -                 | -1  | ogm[GRCh37]<br>inv(10)(q21.3q22.1)  |
| Relapse (+225d) | 10 | 10 | 70880833  | 70892163  | 1    | inversion              | NA  | 0.02 | -1 | 0  | VPS26A                                                                                                                  | -                 | 8   | ogm[GRCh37]<br>inv(10)(q22.1q22.1)  |
| Relapse (+225d) | 10 | -1 | 70769692  | -1        | 1    | inversion_partial      | NA  | 0.02 | -1 | -1 | -                                                                                                                       | -                 | -1  | ogm[GRCh37]<br>inv(10)(q22.1q22.1)  |
| Relapse (+225d) | 1  | 11 | 155384865 | 3755020   | 0.27 | translocation_interchr | -/- | 0.16 | -1 | 0  | ASH1L;NUP98                                                                                                             | ASH1L-<br>NUP98   | 57  | ogm[GRCh37]<br>t(1;11)(q22;p15.4)   |
| Relapse (+225d) | 1  | 9  | 156684968 | 36297734  | 0.96 | translocation_interchr | +/- | 0.04 | -1 | 0  | -                                                                                                                       | -                 | 8   | ogm[GRCh37]<br>t(1;9)(q23.1;p13.3)  |
| Relapse (+225d) | 3  | 10 | 10273471  | 71641510  | 0.38 | translocation_interchr | +/+ | 0.02 | -1 | 0  | IRAK2;COL13A1                                                                                                           | IRAK2-<br>COL13A1 | 8   | ogm[GRCh37]<br>t(3;10)(p25.3;q22.1) |
| Relapse (+225d) | 3  | 10 | 14768714  | 70495589  | 1    | translocation_interchr | +/- | 0.15 | -1 | 0  | C3orf20;CCAR1                                                                                                           | C3orf20-<br>CCAR1 | 43  | ogm[GRCh37]<br>t(3;10)(p25.1;q21.3) |

|                 |    |    |           |           |      |                        |     |      |    |   |                   |                   |     |                                       |
|-----------------|----|----|-----------|-----------|------|------------------------|-----|------|----|---|-------------------|-------------------|-----|---------------------------------------|
| Relapse (+225d) | 3  | 10 | 15610571  | 64319172  | 0.96 | translocation_interchr | +/+ | 0.02 | -1 | 0 | HACL1;ZNF365      | HACL1-ZNF365      | 5   | ogm[GRCh37]<br>t(3;10)(p25.1;q21.2)   |
| Relapse (+225d) | 3  | 10 | 16344791  | 72152951  | 1    | translocation_interchr | +/+ | 0.41 | -1 | 0 | OXNAD1            | -                 | 157 | ogm[GRCh37]<br>t(3;10)(p25.1;q22.1)   |
| Relapse (+225d) | 3  | 21 | 16778711  | 30261569  | 0.73 | translocation_interchr | +/+ | 0.02 | -1 | 0 | -                 | -                 | 5   | ogm[GRCh37]<br>t(3;21)(p24.3;q21.3)   |
| Relapse (+225d) | 3  | 10 | 17922015  | 64929786  | 0.68 | translocation_interchr | -/+ | 0.01 | -1 | 0 | JMJD1C            | -                 | 5   | ogm[GRCh37]<br>t(3;10)(p24.3;q21.3)   |
| Relapse (+225d) | 3  | 10 | 17933829  | 64206980  | 0.97 | translocation_interchr | +/+ | 0.02 | -1 | 0 | ZNF365            | -                 | 5   | ogm[GRCh37]<br>t(3;10)(p24.3;q21.2)   |
| Relapse (+225d) | 3  | 10 | 18210816  | 64882177  | 0.86 | translocation_interchr | +/- | 0.02 | -1 | 0 | LOC339862         | -                 | 8   | ogm[GRCh37]<br>t(3;10)(p24.3;q21.3)   |
| Relapse (+225d) | 3  | 21 | 18733184  | 42711338  | 0.33 | translocation_interchr | +/+ | 0.03 | -1 | 0 | FAM3B             | -                 | 7   | ogm[GRCh37]<br>t(3;21)(p24.3;q22.3)   |
| Relapse (+225d) | 3  | 10 | 7650922   | 72512994  | 0.98 | translocation_interchr | +/- | 0.08 | -1 | 0 | GRM7;ADAMTS14     | GRM7-ADAMTS14     | 22  | ogm[GRCh37]<br>t(3;10)(p26.1;q22.1)   |
| Relapse (+225d) | 3  | 10 | 8316163   | 64935875  | 0.75 | translocation_interchr | +/+ | 0.02 | -1 | 0 | LMCD1-AS1;JMJD1C  | LMCD1-AS1-JMJD1C  | 7   | ogm[GRCh37]<br>t(3;10)(p26.1;q21.3)   |
| Relapse (+225d) | 3  | 10 | 8383755   | 71718153  | 1    | translocation_interchr | +/+ | 0.27 | -1 | 0 | LMCD1-AS1;COL13A1 | LMCD1-AS1-COL13A1 | 126 | ogm[GRCh37]<br>t(3;10)(p26.1;q22.1)   |
| Relapse (+225d) | 3  | 10 | 86013858  | 63895519  | 0.97 | translocation_interchr | +/+ | 0.14 | -1 | 0 | CADM2             | -                 | 63  | ogm[GRCh37]<br>t(3;10)(p12.1;q21.2)   |
| Relapse (+225d) | 3  | 10 | 86136385  | 71272364  | 1    | translocation_interchr | +/+ | 0.17 | -1 | 0 | -                 | -                 | 51  | ogm[GRCh37]<br>t(3;10)(p12.1;q22.1)   |
| Relapse (+225d) | 3  | 10 | 86634401  | 63706716  | 1    | translocation_interchr | +/+ | 0.3  | -1 | 0 | ARID5B            | -                 | 126 | ogm[GRCh37]<br>t(3;10)(p12.1;q21.2)   |
| Relapse (+225d) | 3  | 10 | 9689847   | 72541265  | 0.98 | translocation_interchr | +/+ | 0.28 | -1 | 0 | TBATA             | -                 | 103 | ogm[GRCh37]<br>t(3;10)(p25.3;q22.1)   |
| Relapse (+225d) | 5  | 10 | 132131355 | 75647791  | 1    | translocation_interchr | +/+ | 0.25 | -1 | 0 | -                 | -                 | 85  | ogm[GRCh37]<br>t(5;10)(q31.1;q22.2)   |
| Relapse (+225d) | 7  | 17 | 54524974  | 35512065  | 0.53 | translocation_interchr | +/+ | 0.02 | -1 | 0 | ACACA             | -                 | 7   | ogm[GRCh37]<br>t(7;17)(p11.2;q12)     |
| Relapse (+225d) | 7  | 10 | 56030988  | 71551093  | 0.48 | translocation_interchr | -/+ | 0.02 | -1 | 0 | -                 | -                 | 6   | ogm[GRCh37]<br>t(7;10)(p11.2;q22.1)   |
| Relapse (+225d) | 10 | 21 | 72180437  | 34005936  | 0.81 | translocation_interchr | +/+ | 0.06 | -1 | 0 | EIF4EBP2;SYNJ1    | EIF4EBP2-SYNJ1    | 12  | ogm[GRCh37]<br>t(10;21)(q22.1;q22.11) |
| Relapse (+225d) | 11 | 21 | 21948118  | 17221321  | 0.74 | translocation_interchr | +/- | 0.03 | -1 | 0 | USP25             | -                 | 6   | ogm[GRCh37]<br>t(11;21)(p14.3;q21.1)  |
| Relapse (+225d) | 3  | 3  | 11703830  | 141424983 | 0.99 | translocation_intrachr | -/+ | 0.2  | -1 | 0 | -                 | -                 | 82  | ogm[GRCh37]<br>fus(3;3)(p25.3;q23)    |

|                 |    |    |           |           |      |                        |     |      |        |   |                 |   |     |                                        |
|-----------------|----|----|-----------|-----------|------|------------------------|-----|------|--------|---|-----------------|---|-----|----------------------------------------|
| Relapse (+225d) | 3  | 3  | 17664324  | 87820862  | 0.76 | translocation_intrachr | +/+ | 0.01 | -1     | 0 | TBC1D5          | - | 5   | ogm[GRCh37]<br>fus(3;3)(p24.3;p11.2)   |
| Relapse (+225d) | 3  | 3  | 18334993  | 158408263 | 0.96 | translocation_intrachr | -/+ | 0.02 | -1     | 0 | GFM1            | - | 14  | ogm[GRCh37]<br>fus(3;3)(p24.3;q25.32)  |
| Relapse (+225d) | 3  | 3  | 19043437  | 85941272  | 1    | translocation_intrachr | +/+ | 0.36 | -1     | 0 | CADM2           | - | 131 | ogm[GRCh37]<br>fus(3;3)(p24.3;p12.1)   |
| Relapse (+225d) | 3  | 3  | 5935872   | 87094899  | 0.82 | translocation_intrachr | +/+ | 0.17 | -1     | 0 | -               | - | 56  | ogm[GRCh37]<br>fus(3;3)(p26.1;p12.1)   |
| Relapse (+225d) | 3  | 3  | 5935872   | 87109137  | 0.76 | translocation_intrachr | +/+ | 0.17 | -1     | 0 | -               | - | 56  | ogm[GRCh37]<br>fus(3;3)(p26.1;p12.1)   |
| Relapse (+225d) | 3  | 3  | 7921134   | 84406015  | 0.34 | translocation_intrachr | +/+ | 0.06 | -1     | 0 | -               | - | 45  | ogm[GRCh37]<br>fus(3;3)(p26.1;p12.1)   |
| Relapse (+225d) | 3  | 3  | 7921824   | 15366443  | 0.85 | translocation_intrachr | -/+ | 0.03 | -1     | 0 | SH3BP5          | - | 29  | ogm[GRCh37]<br>fus(3;3)(p26.1;p25.1)   |
| Relapse (+225d) | 3  | 3  | 8161284   | 18717679  | 0.71 | translocation_intrachr | +/+ | 0.02 | -1     | 0 | -               | - | 7   | ogm[GRCh37]<br>fus(3;3)(p26.1;p24.3)   |
| Relapse (+225d) | 7  | 7  | 49327245  | 56028783  | 0.54 | translocation_intrachr | +/- | 0.02 | -1     | 0 | -               | - | 7   | ogm[GRCh37]<br>fus(7;7)(p12.2;p11.2)   |
| Relapse (+225d) | 21 | 21 | 24252871  | 42525873  | 0.24 | translocation_intrachr | -/+ | 0.01 | -1     | 0 | -               | - | 5   | ogm[GRCh37]<br>fus(21;21)(q21.2;q22.2) |
| Relapse (+225d) | 21 | 21 | 24495432  | 29856259  | 0.18 | translocation_intrachr | -/+ | 0.03 | -1     | 0 | -               | - | 6   | ogm[GRCh37]<br>fus(21;21)(q21.2;q21.3) |
| Relapse (+225d) | 6  | 6  | 115447157 | 115495071 | -1   | duplication            | NA  | 0.93 | 47915  | 0 | -               | - | 81  | ogm[GRCh37]<br>dup(6)(q22.1q22.1)      |
| Relapse (+225d) | 6  | 6  | 115449485 | 115556170 | -1   | duplication            | NA  | 0.2  | 106686 | 0 | -               | - | 79  | ogm[GRCh37]<br>dup(6)(q22.1q22.1)      |
| Relapse (+225d) | 6  | 6  | 31358385  | 31443800  | -1   | duplication            | NA  | 0.52 | 85416  | 0 | MICA;HCP5;HCG26 | - | 70  | ogm[GRCh37]<br>dup(6)(p21.33p21.33)    |
| Relapse (+225d) | 7  | 7  | 64992019  | 65031612  | -1   | duplication            | NA  | 0.38 | 39594  | 0 | -               | - | 88  | ogm[GRCh37]<br>dup(7)(q11.21q11.21)    |
| Relapse (+225d) | 5  | 5  | 115956150 | 116077394 | -1   | duplication_inverted   | NA  | 0.33 | 121245 | 0 | Mir_633         | - | 39  | ogm[GRCh37]<br>dup(5)(q23.1q23.1)      |
| Relapse (+225d) | 5  | 5  | 115956150 | 116088873 | -1   | duplication_inverted   | NA  | 0.33 | 132724 | 0 | Mir_633         | - | 74  | ogm[GRCh37]<br>dup(5)(q23.1q23.1)      |

**Supplementary Table 3: Optical Genome Mapping - Rare Variant Pipeline Rare – Confident Copy Number Variants**

| Time point of analysis (Day) | Chr | Reference Start | Reference End | Size in bases | Type | fractional Copy Number | Copy Number | Confidence  | VAF         |
|------------------------------|-----|-----------------|---------------|---------------|------|------------------------|-------------|-------------|-------------|
| AML diagnosis (0d)           | 1   | 246656863       | 249237532     | 2580670       | gain | 2.436                  | 2           | 0.999999993 | 0.217879327 |
| AML diagnosis (0d)           | 3   | 61829           | 6566166       | 6504338       | loss | 1.139                  | 1           | 1           | 0.430326857 |
| AML diagnosis (0d)           | 3   | 6997453         | 8342330       | 1344878       | loss | 1.401                  | 1           | 1           | 0.299701917 |
| AML diagnosis (0d)           | 3   | 8348572         | 9672818       | 1324247       | loss | 1.136                  | 1           | 1           | 0.431986042 |
| AML diagnosis (0d)           | 3   | 9680389         | 14839124      | 5158736       | loss | 1.460                  | 1           | 1           | 0.269786568 |
| AML diagnosis (0d)           | 3   | 14853297        | 16361890      | 1508594       | loss | 1.331                  | 1           | 1           | 0.334635466 |
| AML diagnosis (0d)           | 3   | 19043437        | 85935616      | 66892180      | loss | 1.116                  | 1           | 1           | 0.442248822 |
| AML diagnosis (0d)           | 3   | 87777096        | 88584653      | 807558        | gain | 2.458                  | 2           | 0.999995058 | 0.229211347 |
| AML diagnosis (0d)           | 3   | 89064454        | 90470323      | 1405870       | loss | 1.463                  | 1           | 0.999998782 | 0.268466665 |
| AML diagnosis (0d)           | 3   | 93508428        | 168821068     | 75312641      | loss | 1.564                  | 2           | 1           | 0.218248752 |
| AML diagnosis (0d)           | 5   | 132131355       | 180899715     | 48768361      | loss | 1.111                  | 1           | 1           | 0.444318206 |
| AML diagnosis (0d)           | 10  | 17448661        | 17962252      | 513592        | gain | 2.494                  | 2           | 0.999999309 | 0.246993159 |
| AML diagnosis (0d)           | 10  | 42408726        | 46418799      | 4010074       | loss | 1.131                  | 1           | 1           | 0.434481743 |
| AML diagnosis (0d)           | 10  | 48107282        | 49071953      | 964672        | loss | 1.020                  | 1           | 1           | 0.490234346 |
| AML diagnosis (0d)           | 10  | 49084367        | 51125780      | 2041414       | loss | 1.089                  | 1           | 1           | 0.455680521 |
| AML diagnosis (0d)           | 10  | 51398298        | 62428151      | 11029854      | loss | 1.096                  | 1           | 1           | 0.452075057 |
| AML diagnosis (0d)           | 10  | 66822698        | 70285006      | 3462309       | loss | 1.095                  | 1           | 1           | 0.452400843 |
| AML diagnosis (0d)           | 10  | 72462296        | 75699352      | 3237057       | loss | 1.096                  | 1           | 1           | 0.452090902 |
| AML diagnosis (0d)           | 11  | 125802530       | 130123237     | 4320708       | gain | 2.327                  | 2           | 0.999976263 | 0.163386463 |
| AML diagnosis (0d)           | 16  | 2263650         | 21369108      | 19105459      | loss | 1.674                  | 2           | 0.999985365 | 0.163087363 |
| AML diagnosis (0d)           | 16  | 22822268        | 32019651      | 9197384       | loss | 1.688                  | 2           | 0.999980906 | 0.156072851 |
| AML diagnosis (0d)           | 16  | 46438848        | 85148570      | 38709723      | loss | 1.679                  | 2           | 0.999996089 | 0.160730158 |
| Relapse (+225d)              | 1   | 155343758       | 158120830     | 2777073       | gain | 2.403                  | 2           | 0.99999999  | 0.201653839 |
| Relapse (+225d)              | 1   | 158125568       | 158955052     | 829485        | gain | 2.677                  | 3           | 1           | 0.338344699 |
| Relapse (+225d)              | 1   | 158956531       | 205916326     | 46959796      | gain | 2.496                  | 2           | 1           | 0.248020756 |
| Relapse (+225d)              | 1   | 205917505       | 234072600     | 28155096      | gain | 2.461                  | 2           | 1           | 0.230680905 |
| Relapse (+225d)              | 1   | 234074062       | 235161536     | 1087475       | gain | 2.650                  | 3           | 1           | 0.325129032 |
| Relapse (+225d)              | 1   | 235165389       | 245865547     | 10700159      | gain | 2.474                  | 2           | 1           | 0.236758875 |
| Relapse (+225d)              | 1   | 245871339       | 249237532     | 3366194       | gain | 2.617                  | 3           | 1           | 0.308515864 |
| Relapse (+225d)              | 3   | 61829           | 6647413       | 6585585       | loss | 1.532                  | 2           | 1           | 0.233851276 |
| Relapse (+225d)              | 3   | 8359889         | 9690592       | 1330704       | loss | 1.498                  | 1           | 1           | 0.250796699 |
| Relapse (+225d)              | 3   | 16384192        | 19041596      | 2657405       | gain | 2.443                  | 2           | 1           | 0.221736922 |
| Relapse (+225d)              | 3   | 19043437        | 61555309      | 42511873      | loss | 1.499                  | 1           | 1           | 0.250595064 |
| Relapse (+225d)              | 3   | 61559498        | 68436384      | 6876887       | loss | 1.441                  | 1           | 1           | 0.279622487 |
| Relapse (+225d)              | 3   | 68439578        | 85935616      | 17496039      | loss | 1.525                  | 2           | 1           | 0.237250689 |
| Relapse (+225d)              | 3   | 141393291       | 161042132     | 19648842      | gain | 2.391                  | 2           | 0.999999685 | 0.195737799 |



|                 |    |           |           |          |      |       |   |             |             |
|-----------------|----|-----------|-----------|----------|------|-------|---|-------------|-------------|
| Relapse (+225d) | 3  | 161046813 | 197957467 | 36910655 | gain | 2.477 | 2 | 1           | 0.238472357 |
| Relapse (+225d) | 5  | 132065863 | 180899715 | 48833853 | loss | 1.494 | 1 | 1           | 0.252900709 |
| Relapse (+225d) | 10 | 517019    | 17962252  | 17445234 | gain | 2.451 | 2 | 1           | 0.225701756 |
| Relapse (+225d) | 10 | 17963081  | 39074032  | 21110952 | gain | 2.446 | 2 | 0.999999999 | 0.223194819 |
| Relapse (+225d) | 10 | 42907613  | 46418799  | 3511187  | loss | 1.472 | 1 | 1           | 0.264187944 |
| Relapse (+225d) | 10 | 48107282  | 48747765  | 640484   | loss | 1.409 | 1 | 1           | 0.295625551 |
| Relapse (+225d) | 10 | 49084367  | 51125780  | 2041414  | loss | 1.452 | 1 | 1           | 0.274092766 |
| Relapse (+225d) | 10 | 51398298  | 62428151  | 11029854 | loss | 1.497 | 1 | 1           | 0.251286239 |
| Relapse (+225d) | 10 | 62429156  | 63388827  | 959672   | gain | 2.472 | 2 | 0.999999997 | 0.235993032 |
| Relapse (+225d) | 10 | 63722712  | 65892309  | 2169598  | gain | 2.562 | 3 | 1           | 0.281143168 |
| Relapse (+225d) | 10 | 66791150  | 70285006  | 3493857  | loss | 1.532 | 2 | 1           | 0.233772502 |
| Relapse (+225d) | 10 | 72504636  | 75695386  | 3190751  | loss | 1.464 | 1 | 1           | 0.268229864 |
| Relapse (+225d) | 21 | 14755232  | 47282074  | 32526843 | gain | 2.446 | 2 | 1           | 0.223132469 |
| Relapse (+225d) | 22 | 16695297  | 17500113  | 804817   | gain | 2.996 | 3 | 1           | 0.498021235 |
| Relapse (+225d) | 22 | 17509712  | 18645711  | 1136000  | gain | 2.691 | 3 | 1           | 0.345268    |
| Relapse (+225d) | 22 | 18864171  | 20356873  | 1492703  | gain | 2.885 | 3 | 1           | 0.442335644 |
| Relapse (+225d) | 22 | 20625703  | 48840122  | 28214420 | gain | 2.816 | 3 | 1           | 0.408110605 |

**Supplementary Table 4: Optical Genome Mapping - Rare Variant Pipeline – Confident Aneuploidy Calls**

| Time point         | Chr | Aneuploidy type | Fraction of complete chromosome length | Confidence   | Fractional Copy Number |
|--------------------|-----|-----------------|----------------------------------------|--------------|------------------------|
| AML diagnosis (0d) | 3   | loss            | 0,8204514067                           | 1            | 1,114170659            |
| AML diagnosis (0d) | 16  | loss            | 0,8778554944                           | 0,9999999744 | 1,633344541            |
| Relapse (+225d)    | 21  | gain            | 0,936071812                            | 1            | 2,444302749            |
| Relapse (+225d)    | 22  | gain            | 0,965232492                            | 1            | 2,877173468            |
